# Supplementary material for: A new strategy of spray pyrolysis to prepare porous carbon nanosheets with enhanced ionic sorption capacity
Source: Royal Society of Chemistry journal article supplement (doi:10.1039/c5ra23785h), 2015-12-21
Supplement: c5ra23785h1.pdf [file c5ra23785h1.pdf]

## Supporting Information

### **A new strategy of spray pyrolysis to prepare porous carbon nanosheet with enhanced ionic sorption capacity**

Pung Ho Kim and Kyeong Youl Jung<sup>†</sup>

This file includes:

- (1) Schematic diagram of the ultrasonic spray pyrolysis system.
- (2) XRD pattern of the carbon SP1 particles obtained after the ultrasonic washing process.
- (3) SEM images before (a) and after (b) the ultrasonic washing for the carbon SP1 prepared by spray pyrolysis.
- (4) EDX analysis results before (a) and after (b) the ultrasonic washing for the carbon SP1 prepared by spray pyrolysis.
- (5) SEM images of the carbon particles (SP2) prepared by changing the concentration of polyethylene glycol added to the spray solution.
- (6) Fig. S6 (a) SEM and (b) TEM images of the carbon particles (SP3) obtained after the ultrasonic washing for 4 h.
- (7) Fig. S7 Cycling performance of carbon electrodes.

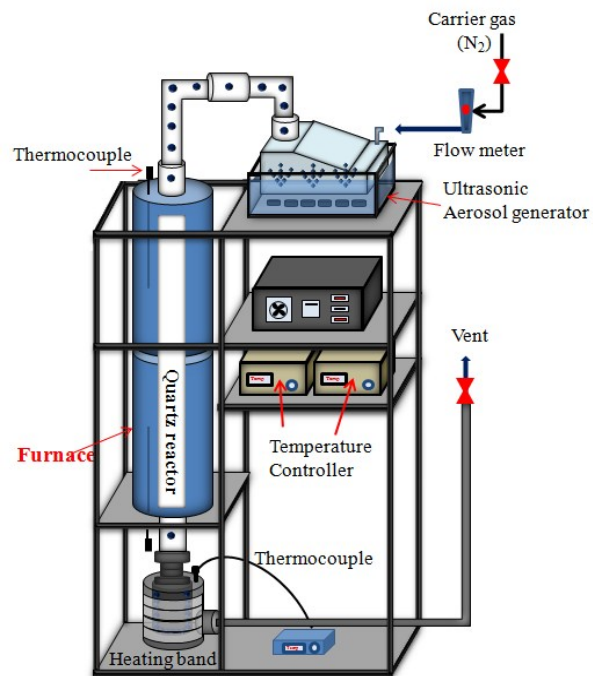

**Fig. S1.** Schematic diagram of the ultrasonic spray pyrolysis system.

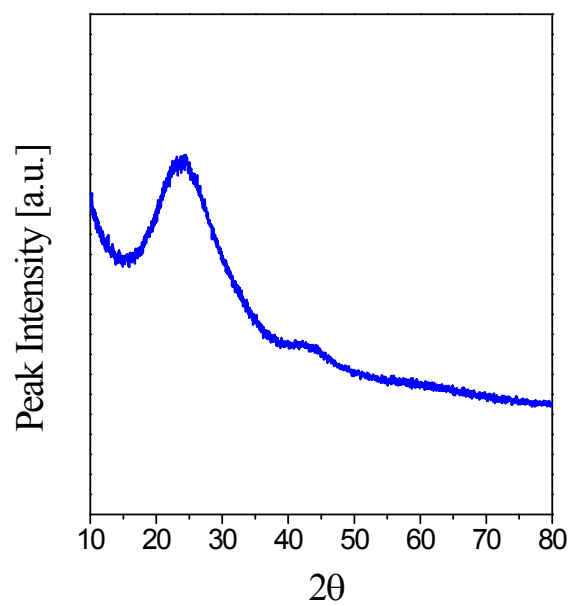

**Fig. S2** XRD pattern of the carbon SP1 particles obtained after the ultrasonic washing process.

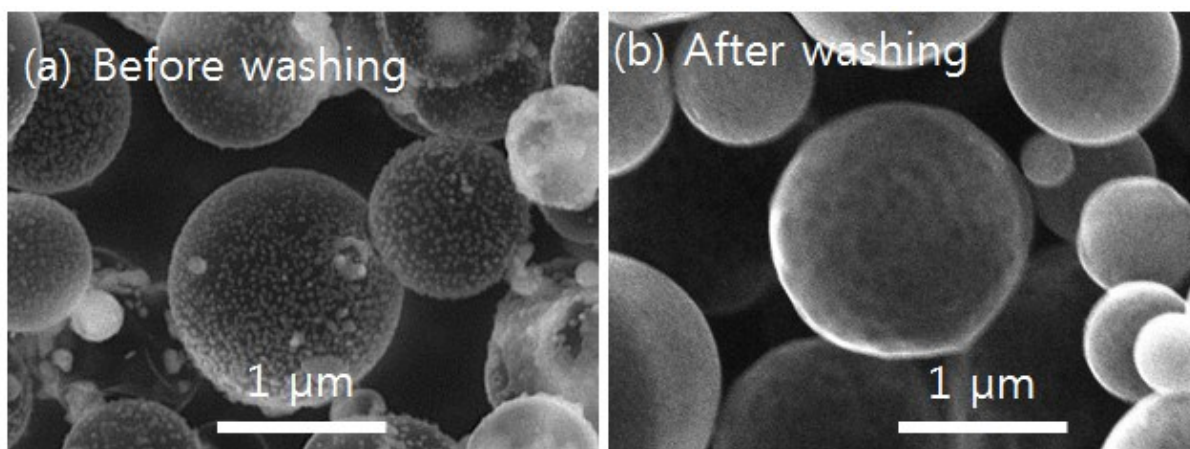

**Fig. S3** SEM images before (a) and after (b) the ultrasonic washing for the carbon SP1 prepared by spray pyrolysis.

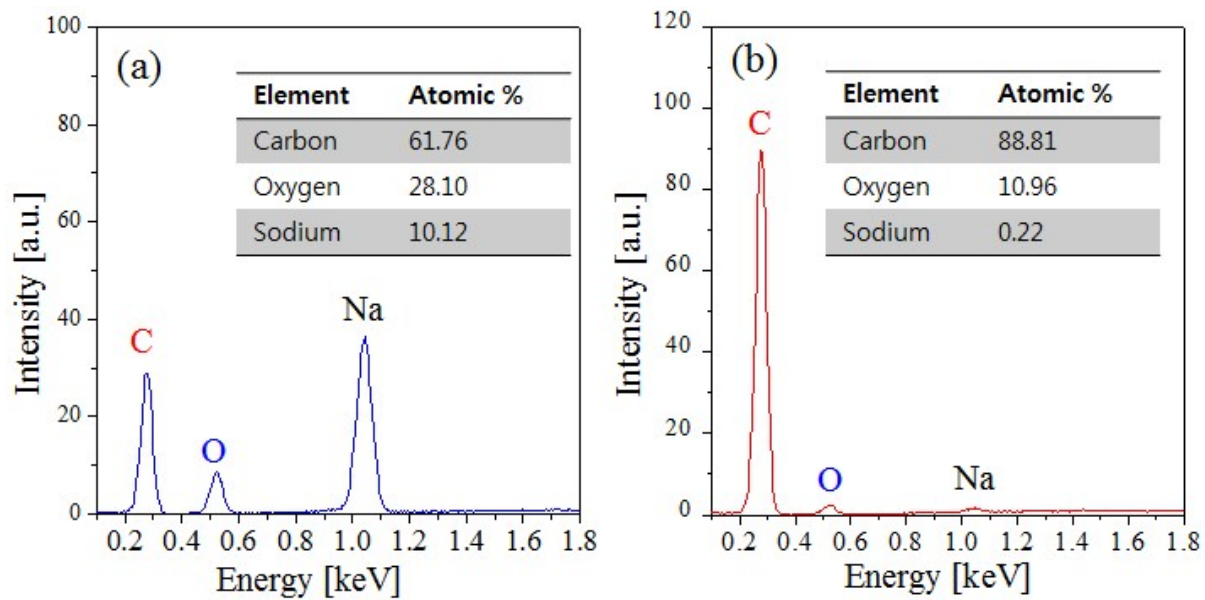

**Fig. S4** EDX analysis results before (a) and after (b) the ultrasonic washing for the carbon SP1 prepared by spray pyrolysis.

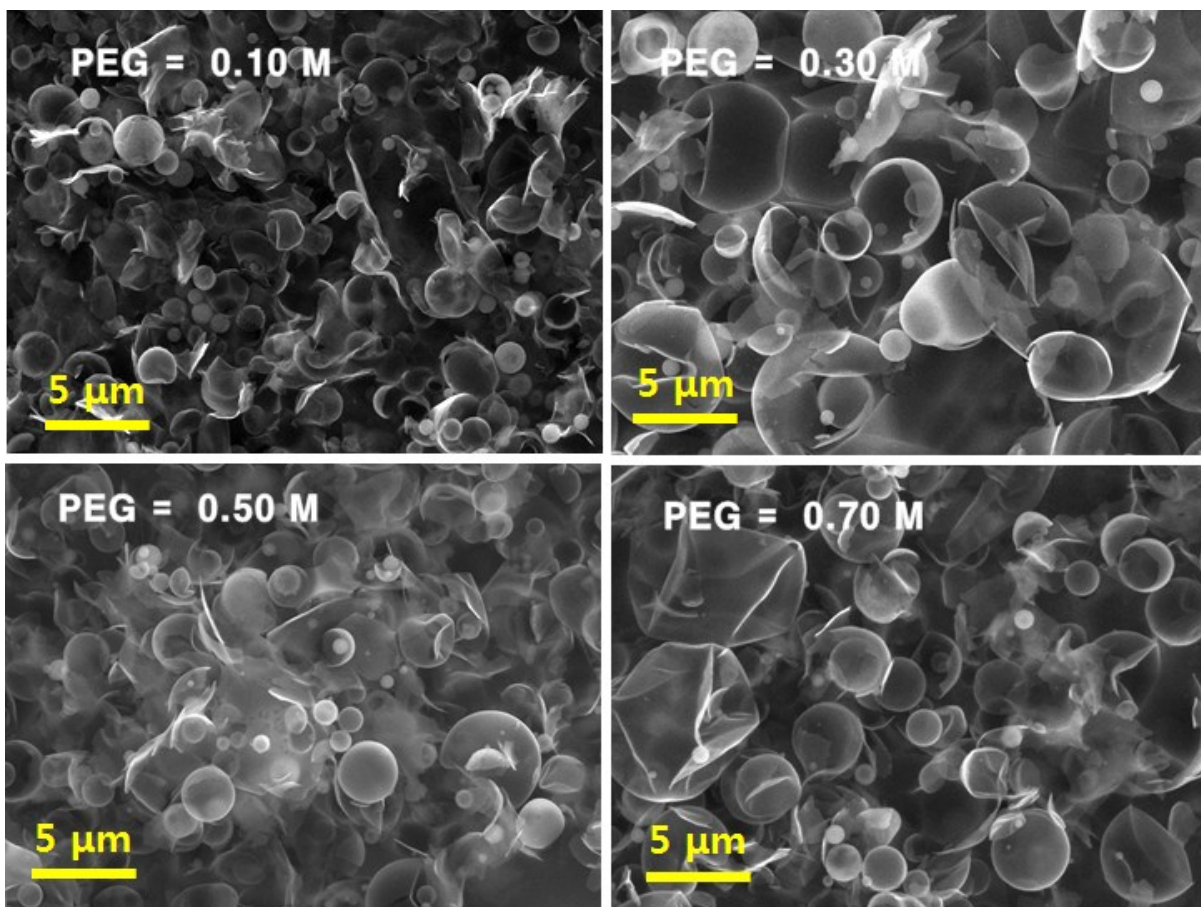

**Fig. S5** SEM images of the carbon particles (SP2) prepared by changing the concentration of polyethylene glycol added to the spray solution.

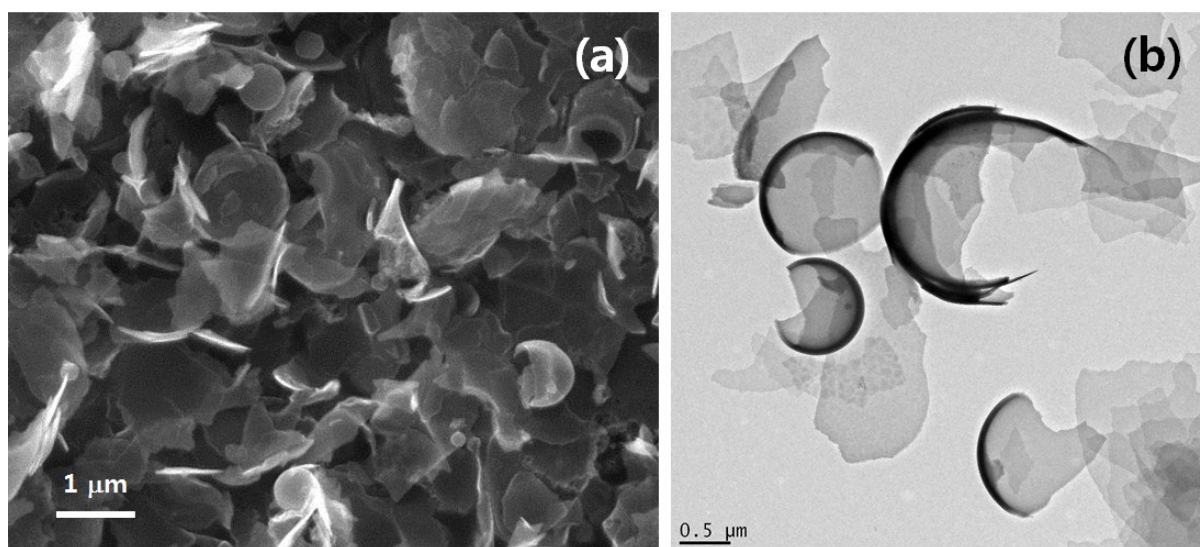

**Fig. S6** (a) SEM and (b) TEM images of the carbon particles (SP3) obtained after the ultrasonic washing for 4 h.

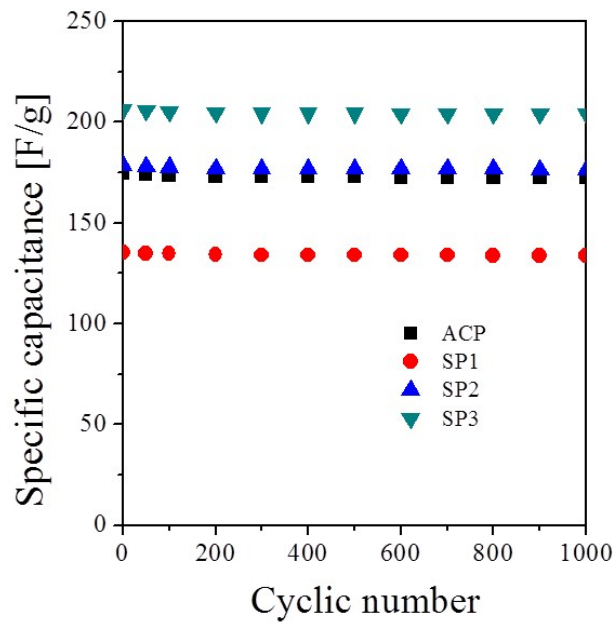

Fig. S7 Cycling performance of carbon electrodes.
